# Supplementary material for: Living on the Edges: Spatial Niche Occupation of Asian Citrus Psyllid, Diaphorina citri Kuwayama (Hemiptera: Liviidae), in Citrus Groves
Source: PubMed Central journal article supplement (PMC4507854; doi:10.1371/journal.pone.0131917), 2015-07-20
Supplement: pone.0131917.s001.pdf [file pone.0131917.s001.pdf]

1 **Appendix 3.** Simple regression analysis describing the relationships between *D. citri* adult  
 2 densities on flush shoots of citrus trees at different positions in a grove for area-survey and  
 3 between adults caught on traps placed at different positions in the field study.

| Relationship between adult <i>D. citri</i> densities/flush | Intercept<br>( <i>a</i> ) | SE ( <i>a</i> ) | Slope<br>( <i>b</i> ) | SE ( <i>b</i> ) | <i>F</i> | <i>R</i> <sup>2</sup> |
|------------------------------------------------------------|---------------------------|-----------------|-----------------------|-----------------|----------|-----------------------|
| Grapefruit (area-wide surveys)                             |                           |                 |                       |                 |          |                       |
| Perimeter ( <i>x</i> ) vs Adjacent ( <i>y</i> )            | 0.052                     | 0.018           | 0.42                  | 0.030           | 189.53** | 0.90                  |
| Perimeter ( <i>x</i> ) vs Interior ( <i>y</i> )            | 0.025                     | 0.018           | 0.28                  | 0.030           | 86.67**  | 0.80                  |
| Adjacent ( <i>x</i> ) vs Interior ( <i>y</i> )             | -0.005                    | 0.019           | 0.65                  | 0.065           | 98.73**  | 0.82                  |
| Sweet orange (area-wide surveys)                           |                           |                 |                       |                 |          |                       |
| Perimeter ( <i>x</i> ) vs Adjacent ( <i>y</i> )            | 0.03                      | 0.042           | 0.54                  | 0.065           | 68.96**  | 0.76                  |
| Perimeter ( <i>x</i> ) vs Interior ( <i>y</i> )            | -0.004                    | 0.029           | 0.26                  | 0.045           | 34.98**  | 0.61                  |
| Adjacent ( <i>x</i> ) vs Interior ( <i>y</i> )             | 0.0003                    | 0.028           | 0.42                  | 0.072           | 34.08**  | 0.61                  |
| Young grapefruit (field study)                             |                           |                 |                       |                 |          |                       |
| Perimeter ( <i>x</i> ) vs Adjacent ( <i>y</i> )            | -0.364                    | 0.904           | 0.41                  | 0.057           | 51.58**  | 0.87                  |
| Perimeter ( <i>x</i> ) vs Interior ( <i>y</i> )            | -0.122                    | 0.509           | 0.032                 | 0.045           | 41.30**  | 0.84                  |
| Adjacent ( <i>x</i> ) vs Interior ( <i>y</i> )             | 0.047                     | 0.155           | 0.51                  | 0.023           | 473.02** | 0.98                  |

4 \*\* = highly significant (P < 0.01)

5

6
