# Supplementary material for: Living on the Edges: Spatial Niche Occupation of Asian Citrus Psyllid, Diaphorina citri Kuwayama (Hemiptera: Liviidae), in Citrus Groves
Source: PLoS One. 2015 Jul 20;10(7):e0131917. doi: 10.1371/journal.pone.0131917 (PMC4507854; doi:10.1371/journal.pone.0131917)
Supplement: S3 Appendix — (XLSX) [file pone.0131917.s003.xlsx]

## Sheet: Mature Grove
Date	Position	Row	Transect	Orientation	ACP
2012-02-28	Perimeter	1	1	East	0
2012-02-28	Perimeter	2	1	East	0
2012-02-28	Perimeter	3	1	East	0
2012-02-28	Perimeter	4	1	East	0
2012-02-28	Perimeter	5	1	East	0
2012-02-28	Perimeter	6	1	East	0
2012-02-28	Perimeter	7	1	East	0
2012-02-28	Perimeter	8	1	East	0
2012-02-28	Perimeter	1	2	Intereast	0
2012-02-28	Adjacent	2	2	Intereast	0
2012-02-28	Inside	3	2	Intereast	0
2012-02-28	Inside	4	2	Intereast	0
2012-02-28	Inside	5	2	Intereast	0
2012-02-28	Inside	6	2	Intereast	0
2012-02-28	Adjacent	7	2	Intereast	0
2012-02-28	Perimeter	8	2	Intereast	0
2012-02-28	Perimeter	1	3	Middle	0
2012-02-28	Adjacent	2	3	Middle	0
2012-02-28	Inside	3	3	Middle	0
2012-02-28	Inside	4	3	Middle	0
2012-02-28	Inside	5	3	Middle	0
2012-02-28	Inside	6	3	Middle	0
2012-02-28	Adjacent	7	3	Middle	0
2012-02-28	Perimeter	8	3	Middle	0
2012-02-28	Perimeter	1	4	Interwest	0
2012-02-28	Adjacent	2	4	Interwest	0
2012-02-28	Inside	3	4	Interwest	0
2012-02-28	Inside	4	4	Interwest	0
2012-02-28	Inside	5	4	Interwest	0
2012-02-28	Inside	6	4	Interwest	0
2012-02-28	Adjacent	7	4	Interwest	0
2012-02-28	Perimeter	8	4	Interwest	0
2012-02-28	Perimeter	1	5	West	0
2012-02-28	Perimeter	2	5	West	0
2012-02-28	Perimeter	3	5	West	0
2012-02-28	Perimeter	4	5	West	0
2012-02-28	Perimeter	5	5	West	0
2012-02-28	Perimeter	6	5	West	0
2012-02-28	Perimeter	7	5	West	0
2012-02-28	Perimeter	8	5	West	0
2012-03-02	Perimeter	1	1	East	0
2012-03-02	Perimeter	2	1	East	0
2012-03-02	Perimeter	3	1	East	0
2012-03-02	Perimeter	4	1	East	0
2012-03-02	Perimeter	5	1	East	0
2012-03-02	Perimeter	6	1	East	0
2012-03-02	Perimeter	7	1	East	0
2012-03-02	Perimeter	8	1	East	0
2012-03-02	Perimeter	1	2	Intereast	0
2012-03-02	Adjacent	2	2	Intereast	0
2012-03-02	Inside	3	2	Intereast	0
2012-03-02	Inside	4	2	Intereast	0
2012-03-02	Inside	5	2	Intereast	0
2012-03-02	Inside	6	2	Intereast	0
2012-03-02	Adjacent	7	2	Intereast	0
2012-03-02	Perimeter	8	2	Intereast	0
2012-03-02	Perimeter	1	3	Middle	0
2012-03-02	Adjacent	2	3	Middle	0
2012-03-02	Inside	3	3	Middle	0
2012-03-02	Inside	4	3	Middle	0
2012-03-02	Inside	5	3	Middle	0
2012-03-02	Inside	6	3	Middle	0
2012-03-02	Adjacent	7	3	Middle	0
2012-03-02	Perimeter	8	3	Middle	0
2012-03-02	Perimeter	1	4	Interwest	0
2012-03-02	Adjacent	2	4	Interwest	0
2012-03-02	Inside	3	4	Interwest	0
2012-03-02	Inside	4	4	Interwest	0
2012-03-02	Inside	5	4	Interwest	0
2012-03-02	Inside	6	4	Interwest	0
2012-03-02	Adjacent	7	4	Interwest	0
2012-03-02	Perimeter	8	4	Interwest	0
2012-03-02	Perimeter	1	5	West	0
2012-03-02	Perimeter	2	5	West	0
2012-03-02	Perimeter	3	5	West	0
2012-03-02	Perimeter	4	5	West	0
2012-03-02	Perimeter	5	5	West	0
2012-03-02	Perimeter	6	5	West	0
2012-03-02	Perimeter	7	5	West	0
2012-03-02	Perimeter	8	5	West	0
2012-03-09	Perimeter	1	1	East	0
2012-03-09	Perimeter	2	1	East	0
2012-03-09	Perimeter	3	1	East	0
2012-03-09	Perimeter	4	1	East	0
2012-03-09	Perimeter	5	1	East	0
2012-03-09	Perimeter	6	1	East	0
2012-03-09	Perimeter	7	1	East	0
2012-03-09	Perimeter	8	1	East	0
2012-03-09	Perimeter	1	2	Intereast	0
2012-03-09	Adjacent	2	2	Intereast	0
2012-03-09	Inside	3	2	Intereast	0
2012-03-09	Inside	4	2	Intereast	0
2012-03-09	Inside	5	2	Intereast	0
2012-03-09	Inside	6	2	Intereast	0
2012-03-09	Adjacent	7	2	Intereast	0
2012-03-09	Perimeter	8	2	Intereast	0
2012-03-09	Perimeter	1	3	Middle	0
2012-03-09	Adjacent	2	3	Middle	0
2012-03-09	Inside	3	3	Middle	0
2012-03-09	Inside	4	3	Middle	0
2012-03-09	Inside	5	3	Middle	0
2012-03-09	Inside	6	3	Middle	0
2012-03-09	Adjacent	7	3	Middle	0
2012-03-09	Perimeter	8	3	Middle	0
2012-03-09	Perimeter	1	4	Interwest	0
2012-03-09	Adjacent	2	4	Interwest	0
2012-03-09	Inside	3	4	Interwest	0
2012-03-09	Inside	4	4	Interwest	0
2012-03-09	Inside	5	4	Interwest	0
2012-03-09	Inside	6	4	Interwest	0
2012-03-09	Adjacent	7	4	Interwest	0
2012-03-09	Perimeter	8	4	Interwest	0
2012-03-09	Perimeter	1	5	West	0
2012-03-09	Perimeter	2	5	West	0
2012-03-09	Perimeter	3	5	West	0
2012-03-09	Perimeter	4	5	West	0
2012-03-09	Perimeter	5	5	West	0
2012-03-09	Perimeter	6	5	West	0
2012-03-09	Perimeter	7	5	West	0
2012-03-09	Perimeter	8	5	West	0
2012-03-14	Perimeter	1	1	East	0
2012-03-14	Perimeter	2	1	East	0
2012-03-14	Perimeter	3	1	East	0
2012-03-14	Perimeter	4	1	East	0
2012-03-14	Perimeter	5	1	East	0
2012-03-14	Perimeter	6	1	East	0
2012-03-14	Perimeter	7	1	East	0
2012-03-14	Perimeter	8	1	East	0
2012-03-14	Perimeter	1	2	Intereast	0
2012-03-14	Adjacent	2	2	Intereast	0
2012-03-14	Inside	3	2	Intereast	0
2012-03-14	Inside	4	2	Intereast	0
2012-03-14	Inside	5	2	Intereast	0
2012-03-14	Inside	6	2	Intereast	0
2012-03-14	Adjacent	7	2	Intereast	0
2012-03-14	Perimeter	8	2	Intereast	0
2012-03-14	Perimeter	1	3	Middle	0
2012-03-14	Adjacent	2	3	Middle	0
2012-03-14	Inside	3	3	Middle	0
2012-03-14	Inside	4	3	Middle	0
2012-03-14	Inside	5	3	Middle	0
2012-03-14	Inside	6	3	Middle	0
2012-03-14	Adjacent	7	3	Middle	0
2012-03-14	Perimeter	8	3	Middle	0
2012-03-14	Perimeter	1	4	Interwest	0
2012-03-14	Adjacent	2	4	Interwest	0
2012-03-14	Inside	3	4	Interwest	0
2012-03-14	Inside	4	4	Interwest	0
2012-03-14	Inside	5	4	Interwest	0
2012-03-14	Inside	6	4	Interwest	0
2012-03-14	Adjacent	7	4	Interwest	0
2012-03-14	Perimeter	8	4	Interwest	0
2012-03-14	Perimeter	1	5	West	0
2012-03-14	Perimeter	2	5	West	0
2012-03-14	Perimeter	3	5	West	0
2012-03-14	Perimeter	4	5	West	0
2012-03-14	Perimeter	5	5	West	0
2012-03-14	Perimeter	6	5	West	0
2012-03-14	Perimeter	7	5	West	0
2012-03-14	Perimeter	8	5	West	0
2012-03-23	Perimeter	1	1	East	0
2012-03-23	Perimeter	2	1	East	0
2012-03-23	Perimeter	3	1	East	0
2012-03-23	Perimeter	4	1	East	0
2012-03-23	Perimeter	5	1	East	0
2012-03-23	Perimeter	6	1	East	0
2012-03-23	Perimeter	7	1	East	0
2012-03-23	Perimeter	8	1	East	0
2012-03-23	Perimeter	1	2	Intereast	0
2012-03-23	Adjacent	2	2	Intereast	0
2012-03-23	Inside	3	2	Intereast	0
2012-03-23	Inside	4	2	Intereast	0
2012-03-23	Inside	5	2	Intereast	0
2012-03-23	Inside	6	2	Intereast	0
2012-03-23	Adjacent	7	2	Intereast	0
2012-03-23	Perimeter	8	2	Intereast	0
2012-03-23	Perimeter	1	3	Middle	0
2012-03-23	Adjacent	2	3	Middle	0
2012-03-23	Inside	3	3	Middle	0
2012-03-23	Inside	4	3	Middle	0
2012-03-23	Inside	5	3	Middle	0
2012-03-23	Inside	6	3	Middle	0
2012-03-23	Adjacent	7	3	Middle	0
2012-03-23	Perimeter	8	3	Middle	0
2012-03-23	Perimeter	1	4	Interwest	0
2012-03-23	Adjacent	2	4	Interwest	0
2012-03-23	Inside	3	4	Interwest	0
2012-03-23	Inside	4	4	Interwest	0
2012-03-23	Inside	5	4	Interwest	0
2012-03-23	Inside	6	4	Interwest	0
2012-03-23	Adjacent	7	4	Interwest	0
2012-03-23	Perimeter	8	4	Interwest	0
2012-03-23	Perimeter	1	5	West	0
2012-03-23	Perimeter	2	5	West	0
2012-03-23	Perimeter	3	5	West	0
2012-03-23	Perimeter	4	5	West	0
2012-03-23	Perimeter	5	5	West	0
2012-03-23	Perimeter	6	5	West	0
2012-03-23	Perimeter	7	5	West	0
2012-03-23	Perimeter	8	5	West	0
2012-03-29	Perimeter	1	1	East	0
2012-03-29	Perimeter	2	1	East	0
2012-03-29	Perimeter	3	1	East	0
2012-03-29	Perimeter	4	1	East	0
2012-03-29	Perimeter	5	1	East	0
2012-03-29	Perimeter	6	1	East	0
2012-03-29	Perimeter	7	1	East	0
2012-03-29	Perimeter	8	1	East	0
2012-03-29	Perimeter	1	2	Intereast	0
2012-03-29	Adjacent	2	2	Intereast	0
2012-03-29	Inside	3	2	Intereast	0
2012-03-29	Inside	4	2	Intereast	0
2012-03-29	Inside	5	2	Intereast	0
2012-03-29	Inside	6	2	Intereast	0
2012-03-29	Adjacent	7	2	Intereast	0
2012-03-29	Perimeter	8	2	Intereast	0
2012-03-29	Perimeter	1	3	Middle	0
2012-03-29	Adjacent	2	3	Middle	0
2012-03-29	Inside	3	3	Middle	0
2012-03-29	Inside	4	3	Middle	0
2012-03-29	Inside	5	3	Middle	0
2012-03-29	Inside	6	3	Middle	0
2012-03-29	Adjacent	7	3	Middle	0
2012-03-29	Perimeter	8	3	Middle	0
2012-03-29	Perimeter	1	4	Interwest	0
2012-03-29	Adjacent	2	4	Interwest	0
2012-03-29	Inside	3	4	Interwest	0
2012-03-29	Inside	4	4	Interwest	0
2012-03-29	Inside	5	4	Interwest	0
2012-03-29	Inside	6	4	Interwest	0
2012-03-29	Adjacent	7	4	Interwest	0
2012-03-29	Perimeter	8	4	Interwest	0
2012-03-29	Perimeter	1	5	West	0
2012-03-29	Perimeter	2	5	West	0
2012-03-29	Perimeter	3	5	West	0
2012-03-29	Perimeter	4	5	West	0
2012-03-29	Perimeter	5	5	West	0
2012-03-29	Perimeter	6	5	West	0
2012-03-29	Perimeter	7	5	West	0
2012-03-29	Perimeter	8	5	West	0
2012-04-04	Perimeter	1	1	East	0
2012-04-04	Perimeter	2	1	East	0
2012-04-04	Perimeter	3	1	East	0
2012-04-04	Perimeter	4	1	East	0
2012-04-04	Perimeter	5	1	East	0
2012-04-04	Perimeter	6	1	East	0
2012-04-04	Perimeter	7	1	East	0
2012-04-04	Perimeter	8	1	East	0
2012-04-04	Perimeter	1	2	Intereast	0
2012-04-04	Adjacent	2	2	Intereast	0
2012-04-04	Inside	3	2	Intereast	0
2012-04-04	Inside	4	2	Intereast	0
2012-04-04	Inside	5	2	Intereast	0
2012-04-04	Inside	6	2	Intereast	0
2012-04-04	Adjacent	7	2	Intereast	0
2012-04-04	Perimeter	8	2	Intereast	0
2012-04-04	Perimeter	1	3	Middle	0
2012-04-04	Adjacent	2	3	Middle	0
2012-04-04	Inside	3	3	Middle	0
2012-04-04	Inside	4	3	Middle	0
2012-04-04	Inside	5	3	Middle	0
2012-04-04	Inside	6	3	Middle	0
2012-04-04	Adjacent	7	3	Middle	0
2012-04-04	Perimeter	8	3	Middle	0
2012-04-04	Perimeter	1	4	Interwest	0
2012-04-04	Adjacent	2	4	Interwest	0
2012-04-04	Inside	3	4	Interwest	0
2012-04-04	Inside	4	4	Interwest	0
2012-04-04	Inside	5	4	Interwest	0
2012-04-04	Inside	6	4	Interwest	0
2012-04-04	Adjacent	7	4	Interwest	0
2012-04-04	Perimeter	8	4	Interwest	0
2012-04-04	Perimeter	1	5	West	0
2012-04-04	Perimeter	2	5	West	0
2012-04-04	Perimeter	3	5	West	0
2012-04-04	Perimeter	4	5	West	0
2012-04-04	Perimeter	5	5	West	0
2012-04-04	Perimeter	6	5	West	0
2012-04-04	Perimeter	7	5	West	0
2012-04-04	Perimeter	8	5	West	0
2012-04-25	Perimeter	1	1	East	0
2012-04-25	Perimeter	2	1	East	0
2012-04-25	Perimeter	3	1	East	0
2012-04-25	Perimeter	4	1	East	0
2012-04-25	Perimeter	5	1	East	0
2012-04-25	Perimeter	6	1	East	1
2012-04-25	Perimeter	7	1	East	0
2012-04-25	Perimeter	8	1	East	0
2012-04-25	Perimeter	1	2	Intereast	0
2012-04-25	Adjacent	2	2	Intereast	0
2012-04-25	Inside	3	2	Intereast	0
2012-04-25	Inside	4	2	Intereast	0
2012-04-25	Inside	5	2	Intereast	0
2012-04-25	Inside	6	2	Intereast	0
2012-04-25	Adjacent	7	2	Intereast	0
2012-04-25	Perimeter	8	2	Intereast	0
2012-04-25	Perimeter	1	3	Middle	0
2012-04-25	Adjacent	2	3	Middle	0
2012-04-25	Inside	3	3	Middle	0
2012-04-25	Inside	4	3	Middle	0
2012-04-25	Inside	5	3	Middle	0
2012-04-25	Inside	6	3	Middle	0
2012-04-25	Adjacent	7	3	Middle	0
2012-04-25	Perimeter	8	3	Middle	0
2012-04-25	Perimeter	1	4	Interwest	0
2012-04-25	Adjacent	2	4	Interwest	0
2012-04-25	Inside	3	4	Interwest	0
2012-04-25	Inside	4	4	Interwest	0
2012-04-25	Inside	5	4	Interwest	0
2012-04-25	Inside	6	4	Interwest	0
2012-04-25	Adjacent	7	4	Interwest	0
2012-04-25	Perimeter	8	4	Interwest	0
2012-04-25	Perimeter	1	5	West	0
2012-04-25	Perimeter	2	5	West	0
2012-04-25	Perimeter	3	5	West	0
2012-04-25	Perimeter	4	5	West	0
2012-04-25	Perimeter	5	5	West	0
2012-04-25	Perimeter	6	5	West	0
2012-04-25	Perimeter	7	5	West	0
2012-04-25	Perimeter	8	5	West	0
2012-05-25	Perimeter	1	1	East	0
2012-05-25	Perimeter	2	1	East	0
2012-05-25	Perimeter	3	1	East	0
2012-05-25	Perimeter	4	1	East	0
2012-05-25	Perimeter	5	1	East	0
2012-05-25	Perimeter	6	1	East	0
2012-05-25	Perimeter	7	1	East	0
2012-05-25	Perimeter	8	1	East	0
2012-05-25	Perimeter	1	2	Intereast	0
2012-05-25	Adjacent	2	2	Intereast	0
2012-05-25	Inside	3	2	Intereast	0
2012-05-25	Inside	4	2	Intereast	0
2012-05-25	Inside	5	2	Intereast	0
2012-05-25	Inside	6	2	Intereast	0
2012-05-25	Adjacent	7	2	Intereast	0
2012-05-25	Perimeter	8	2	Intereast	0
2012-05-25	Perimeter	1	3	Middle	0
2012-05-25	Adjacent	2	3	Middle	0
2012-05-25	Inside	3	3	Middle	0
2012-05-25	Inside	4	3	Middle	0
2012-05-25	Inside	5	3	Middle	0
2012-05-25	Inside	6	3	Middle	0
2012-05-25	Adjacent	7	3	Middle	0
2012-05-25	Perimeter	8	3	Middle	0
2012-05-25	Perimeter	1	4	Interwest	0
2012-05-25	Adjacent	2	4	Interwest	0
2012-05-25	Inside	3	4	Interwest	0
2012-05-25	Inside	4	4	Interwest	0
2012-05-25	Inside	5	4	Interwest	0
2012-05-25	Inside	6	4	Interwest	0
2012-05-25	Adjacent	7	4	Interwest	0
2012-05-25	Perimeter	8	4	Interwest	0
2012-05-25	Perimeter	1	5	West	0
2012-05-25	Perimeter	2	5	West	0
2012-05-25	Perimeter	3	5	West	0
2012-05-25	Perimeter	4	5	West	0
2012-05-25	Perimeter	5	5	West	0
2012-05-25	Perimeter	6	5	West	0
2012-05-25	Perimeter	7	5	West	0
2012-05-25	Perimeter	8	5	West	0
2012-06-13	Perimeter	1	1	East	0
2012-06-13	Perimeter	2	1	East	0
2012-06-13	Perimeter	3	1	East	0
2012-06-13	Perimeter	4	1	East	0
2012-06-13	Perimeter	5	1	East	0
2012-06-13	Perimeter	6	1	East	0
2012-06-13	Perimeter	7	1	East	0
2012-06-13	Perimeter	8	1	East	0
2012-06-13	Perimeter	1	2	Intereast	0
2012-06-13	Adjacent	2	2	Intereast	0
2012-06-13	Inside	3	2	Intereast	0
2012-06-13	Inside	4	2	Intereast	0
2012-06-13	Inside	5	2	Intereast	0
2012-06-13	Inside	6	2	Intereast	0
2012-06-13	Adjacent	7	2	Intereast	0
2012-06-13	Perimeter	8	2	Intereast	0
2012-06-13	Perimeter	1	3	Middle	0
2012-06-13	Adjacent	2	3	Middle	0
2012-06-13	Inside	3	3	Middle	0
2012-06-13	Inside	4	3	Middle	0
2012-06-13	Inside	5	3	Middle	0
2012-06-13	Inside	6	3	Middle	0
2012-06-13	Adjacent	7	3	Middle	0
2012-06-13	Perimeter	8	3	Middle	0
2012-06-13	Perimeter	1	4	Interwest	0
2012-06-13	Adjacent	2	4	Interwest	0
2012-06-13	Inside	3	4	Interwest	0
2012-06-13	Inside	4	4	Interwest	0
2012-06-13	Inside	5	4	Interwest	0
2012-06-13	Inside	6	4	Interwest	0
2012-06-13	Adjacent	7	4	Interwest	0
2012-06-13	Perimeter	8	4	Interwest	0
2012-06-13	Perimeter	1	5	West	0
2012-06-13	Perimeter	2	5	West	0
2012-06-13	Perimeter	3	5	West	0
2012-06-13	Perimeter	4	5	West	0
2012-06-13	Perimeter	5	5	West	0
2012-06-13	Perimeter	6	5	West	0
2012-06-13	Perimeter	7	5	West	0
2012-06-13	Perimeter	8	5	West	0
2012-07-18	Perimeter	1	1	East	0
2012-07-18	Perimeter	2	1	East	1
2012-07-18	Perimeter	3	1	East	0
2012-07-18	Perimeter	4	1	East	0
2012-07-18	Perimeter	5	1	East	1
2012-07-18	Perimeter	6	1	East	0
2012-07-18	Perimeter	7	1	East	0
2012-07-18	Perimeter	8	1	East	0
2012-07-18	Perimeter	1	2	Intereast	0
2012-07-18	Adjacent	2	2	Intereast	0
2012-07-18	Inside	3	2	Intereast	0
2012-07-18	Inside	4	2	Intereast	0
2012-07-18	Inside	5	2	Intereast	0
2012-07-18	Inside	6	2	Intereast	0
2012-07-18	Adjacent	7	2	Intereast	0
2012-07-18	Perimeter	8	2	Intereast	0
2012-07-18	Perimeter	1	3	Middle	1
2012-07-18	Adjacent	2	3	Middle	0
2012-07-18	Inside	3	3	Middle	0
2012-07-18	Inside	4	3	Middle	0
2012-07-18	Inside	5	3	Middle	0
2012-07-18	Inside	6	3	Middle	1
2012-07-18	Adjacent	7	3	Middle	0
2012-07-18	Perimeter	8	3	Middle	0
2012-07-18	Perimeter	1	4	Interwest	0
2012-07-18	Adjacent	2	4	Interwest	0
2012-07-18	Inside	3	4	Interwest	0
2012-07-18	Inside	4	4	Interwest	0
2012-07-18	Inside	5	4	Interwest	0
2012-07-18	Inside	6	4	Interwest	0
2012-07-18	Adjacent	7	4	Interwest	0
2012-07-18	Perimeter	8	4	Interwest	0
2012-07-18	Perimeter	1	5	West	0
2012-07-18	Perimeter	2	5	West	0
2012-07-18	Perimeter	3	5	West	0
2012-07-18	Perimeter	4	5	West	1
2012-07-18	Perimeter	5	5	West	0
2012-07-18	Perimeter	6	5	West	0
2012-07-18	Perimeter	7	5	West	0
2012-07-18	Perimeter	8	5	West	0
2012-08-29	Perimeter	1	1	East	0
2012-08-29	Perimeter	2	1	East	0
2012-08-29	Perimeter	3	1	East	1
2012-08-29	Perimeter	4	1	East	0
2012-08-29	Perimeter	5	1	East	0
2012-08-29	Perimeter	6	1	East	0
2012-08-29	Perimeter	7	1	East	0
2012-08-29	Perimeter	8	1	East	0
2012-08-29	Perimeter	1	2	Intereast	0
2012-08-29	Adjacent	2	2	Intereast	0
2012-08-29	Inside	3	2	Intereast	0
2012-08-29	Inside	4	2	Intereast	0
2012-08-29	Inside	5	2	Intereast	0
2012-08-29	Inside	6	2	Intereast	1
2012-08-29	Adjacent	7	2	Intereast	0
2012-08-29	Perimeter	8	2	Intereast	0
2012-08-29	Perimeter	1	3	Middle	2
2012-08-29	Adjacent	2	3	Middle	2
2012-08-29	Inside	3	3	Middle	0
2012-08-29	Inside	4	3	Middle	0
2012-08-29	Inside	5	3	Middle	0
2012-08-29	Inside	6	3	Middle	0
2012-08-29	Adjacent	7	3	Middle	0
2012-08-29	Perimeter	8	3	Middle	0
2012-08-29	Perimeter	1	4	Interwest	1
2012-08-29	Adjacent	2	4	Interwest	1
2012-08-29	Inside	3	4	Interwest	0
2012-08-29	Inside	4	4	Interwest	1
2012-08-29	Inside	5	4	Interwest	0
2012-08-29	Inside	6	4	Interwest	0
2012-08-29	Adjacent	7	4	Interwest	0
2012-08-29	Perimeter	8	4	Interwest	0
2012-08-29	Perimeter	1	5	West	2
2012-08-29	Perimeter	2	5	West	0
2012-08-29	Perimeter	3	5	West	0
2012-08-29	Perimeter	4	5	West	3
2012-08-29	Perimeter	5	5	West	4
2012-08-29	Perimeter	6	5	West	1
2012-08-29	Perimeter	7	5	West	0
2012-08-29	Perimeter	8	5	West	0
2012-09-15	Perimeter	1	1	East	0
2012-09-15	Perimeter	2	1	East	0
2012-09-15	Perimeter	3	1	East	0
2012-09-15	Perimeter	4	1	East	0
2012-09-15	Perimeter	5	1	East	0
2012-09-15	Perimeter	6	1	East	0
2012-09-15	Perimeter	7	1	East	0
2012-09-15	Perimeter	8	1	East	0
2012-09-15	Perimeter	1	2	Intereast	0
2012-09-15	Adjacent	2	2	Intereast	0
2012-09-15	Inside	3	2	Intereast	0
2012-09-15	Inside	4	2	Intereast	0
2012-09-15	Inside	5	2	Intereast	0
2012-09-15	Inside	6	2	Intereast	0
2012-09-15	Adjacent	7	2	Intereast	0
2012-09-15	Perimeter	8	2	Intereast	0
2012-09-15	Perimeter	1	3	Middle	0
2012-09-15	Adjacent	2	3	Middle	0
2012-09-15	Inside	3	3	Middle	0
2012-09-15	Inside	4	3	Middle	0
2012-09-15	Inside	5	3	Middle	0
2012-09-15	Inside	6	3	Middle	0
2012-09-15	Adjacent	7	3	Middle	0
2012-09-15	Perimeter	8	3	Middle	0
2012-09-15	Perimeter	1	4	Interwest	0
2012-09-15	Adjacent	2	4	Interwest	0
2012-09-15	Inside	3	4	Interwest	0
2012-09-15	Inside	4	4	Interwest	0
2012-09-15	Inside	5	4	Interwest	0
2012-09-15	Inside	6	4	Interwest	0
2012-09-15	Adjacent	7	4	Interwest	0
2012-09-15	Perimeter	8	4	Interwest	0
2012-09-15	Perimeter	1	5	West	0
2012-09-15	Perimeter	2	5	West	0
2012-09-15	Perimeter	3	5	West	0
2012-09-15	Perimeter	4	5	West	0
2012-09-15	Perimeter	5	5	West	0
2012-09-15	Perimeter	6	5	West	0
2012-09-15	Perimeter	7	5	West	0
2012-09-15	Perimeter	8	5	West	0
2012-10-08	Perimeter	1	1	East	0
2012-10-08	Perimeter	2	1	East	0
2012-10-08	Perimeter	3	1	East	0
2012-10-08	Perimeter	4	1	East	1
2012-10-08	Perimeter	5	1	East	0
2012-10-08	Perimeter	6	1	East	0
2012-10-08	Perimeter	7	1	East	0
2012-10-08	Perimeter	8	1	East	0
2012-10-08	Perimeter	1	2	Intereast	0
2012-10-08	Adjacent	2	2	Intereast	0
2012-10-08	Inside	3	2	Intereast	0
2012-10-08	Inside	4	2	Intereast	0
2012-10-08	Inside	5	2	Intereast	0
2012-10-08	Inside	6	2	Intereast	0
2012-10-08	Adjacent	7	2	Intereast	0
2012-10-08	Perimeter	8	2	Intereast	0
2012-10-08	Perimeter	1	3	Middle	0
2012-10-08	Adjacent	2	3	Middle	0
2012-10-08	Inside	3	3	Middle	1
2012-10-08	Inside	4	3	Middle	0
2012-10-08	Inside	5	3	Middle	0
2012-10-08	Inside	6	3	Middle	0
2012-10-08	Adjacent	7	3	Middle	0
2012-10-08	Perimeter	8	3	Middle	0
2012-10-08	Perimeter	1	4	Interwest	0
2012-10-08	Adjacent	2	4	Interwest	0
2012-10-08	Inside	3	4	Interwest	0
2012-10-08	Inside	4	4	Interwest	0
2012-10-08	Inside	5	4	Interwest	0
2012-10-08	Inside	6	4	Interwest	0
2012-10-08	Adjacent	7	4	Interwest	0
2012-10-08	Perimeter	8	4	Interwest	0
2012-10-08	Perimeter	1	5	West	0
2012-10-08	Perimeter	2	5	West	0
2012-10-08	Perimeter	3	5	West	1
2012-10-08	Perimeter	4	5	West	1
2012-10-08	Perimeter	5	5	West	2
2012-10-08	Perimeter	6	5	West	1
2012-10-08	Perimeter	7	5	West	0
2012-10-08	Perimeter	8	5	West	0

## Sheet: Young Grove
Rep	Side	Eastern	trap	Southern	Position	N_S	Date	Southern_Distance	N_Sdistance	ACP
1	West	0	1	1	Perimeter	West	2012-02-28	31	0	0
1	West	0	2	2	Perimeter	West	2012-02-28	62	0	0
1	West	0	3	3	Perimeter	West	2012-02-28	93	0	0
1	West	0	4	4	Perimeter	West	2012-02-28	124	0	0
1	West	0	5	5	Perimeter	West	2012-02-28	155	0	0
1	West	0	6	6	Perimeter	West	2012-02-28	186	0	0
1	West	0	7	7	Perimeter	West	2012-02-28	217	0	0
1	West	0	8	8	Perimeter	West	2012-02-28	248	0	0
1	West	0	9	9	Perimeter	West	2012-02-28	279	0	0
1	West	0	10	10	Perimeter	West	2012-02-28	310	0	0
1	West	0	11	11	Perimeter	West	2012-02-28	341	0	0
1	West	0	12	12	Perimeter	West	2012-02-28	372	0	0
1	West	0	13	13	Perimeter	West	2012-02-28	403	0	0
2	InterWest	1	1	1	Perimeter	InterWest	2012-02-28	31	45	0
2	InterWest	1	2	2	Adjacent	InterWest	2012-02-28	62	45	0
2	InterWest	1	3	3	Inside	InterWest	2012-02-28	93	45	0
2	InterWest	1	4	4	Inside	InterWest	2012-02-28	124	45	0
2	InterWest	1	5	5	Inside	InterWest	2012-02-28	155	45	0
2	InterWest	1	6	6	Inside	InterWest	2012-02-28	186	45	0
2	InterWest	1	7	7	Inside	InterWest	2012-02-28	217	45	0
2	InterWest	1	8	8	Inside	InterWest	2012-02-28	248	45	0
2	InterWest	1	9	9	Inside	InterWest	2012-02-28	279	45	0
2	InterWest	1	10	10	Inside	InterWest	2012-02-28	310	45	0
2	InterWest	1	11	11	Inside	InterWest	2012-02-28	341	45	0
2	InterWest	1	12	12	Adjacent	InterWest	2012-02-28	372	45	0
2	InterWest	1	13	13	Perimeter	InterWest	2012-02-28	403	45	0
3	Middle	2	1	1	Perimeter	Middle	2012-02-28	31	90	0
3	Middle	2	2	2	Adjacent	Middle	2012-02-28	62	90	0
3	Middle	2	3	3	Inside	Middle	2012-02-28	93	90	0
3	Middle	2	4	4	Inside	Middle	2012-02-28	124	90	0
3	Middle	2	5	5	Inside	Middle	2012-02-28	155	90	0
3	Middle	2	6	6	Inside	Middle	2012-02-28	186	90	0
3	Middle	2	7	7	Inside	Middle	2012-02-28	217	90	0
3	Middle	2	8	8	Inside	Middle	2012-02-28	248	90	0
3	Middle	2	9	9	Inside	Middle	2012-02-28	279	90	0
3	Middle	2	10	10	Inside	Middle	2012-02-28	310	90	0
3	Middle	2	11	11	Inside	Middle	2012-02-28	341	90	0
3	Middle	2	12	12	Adjacent	Middle	2012-02-28	372	90	0
3	Middle	2	13	13	Perimeter	Middle	2012-02-28	403	90	0
4	InterEast	3	1	1	Perimeter	InterEast	2012-02-28	31	135	0
4	InterEast	3	2	2	Adjacent	InterEast	2012-02-28	62	135	0
4	InterEast	3	3	3	Inside	InterEast	2012-02-28	93	135	0
4	InterEast	3	4	4	Inside	InterEast	2012-02-28	124	135	0
4	InterEast	3	5	5	Inside	InterEast	2012-02-28	155	135	0
4	InterEast	3	6	6	Inside	InterEast	2012-02-28	186	135	0
4	InterEast	3	7	7	Inside	InterEast	2012-02-28	217	135	0
4	InterEast	3	8	8	Inside	InterEast	2012-02-28	248	135	0
4	InterEast	3	9	9	Inside	InterEast	2012-02-28	279	135	0
4	InterEast	3	10	10	Inside	InterEast	2012-02-28	310	135	0
4	InterEast	3	11	11	Inside	InterEast	2012-02-28	341	135	0
4	InterEast	3	12	12	Adjacent	InterEast	2012-02-28	372	135	0
4	InterEast	3	13	13	Perimeter	InterEast	2012-02-28	403	135	0
5	East	4	1	1	Perimeter	East	2012-02-28	31	180	0
5	East	4	2	2	Perimeter	East	2012-02-28	62	180	0
5	East	4	3	3	Perimeter	East	2012-02-28	93	180	0
5	East	4	4	4	Perimeter	East	2012-02-28	124	180	0
5	East	4	5	5	Perimeter	East	2012-02-28	155	180	0
5	East	4	6	6	Perimeter	East	2012-02-28	186	180	0
5	East	4	7	7	Perimeter	East	2012-02-28	217	180	0
5	East	4	8	8	Perimeter	East	2012-02-28	248	180	0
5	East	4	9	9	Perimeter	East	2012-02-28	279	180	0
5	East	4	10	10	Perimeter	East	2012-02-28	310	180	0
5	East	4	11	11	Perimeter	East	2012-02-28	341	180	0
5	East	4	12	12	Perimeter	East	2012-02-28	372	180	0
5	East	4	13	13	Perimeter	East	2012-02-28	403	180	0
1	West	0	1	1	Perimeter	West	2012-03-02	31	0	0
1	West	0	2	2	Perimeter	West	2012-03-02	62	0	0
1	West	0	3	3	Perimeter	West	2012-03-02	93	0	0
1	West	0	4	4	Perimeter	West	2012-03-02	124	0	0
1	West	0	5	5	Perimeter	West	2012-03-02	155	0	0
1	West	0	6	6	Perimeter	West	2012-03-02	186	0	0
1	West	0	7	7	Perimeter	West	2012-03-02	217	0	0
1	West	0	8	8	Perimeter	West	2012-03-02	248	0	0
1	West	0	9	9	Perimeter	West	2012-03-02	279	0	0
1	West	0	10	10	Perimeter	West	2012-03-02	310	0	0
1	West	0	11	11	Perimeter	West	2012-03-02	341	0	0
1	West	0	12	12	Perimeter	West	2012-03-02	372	0	0
1	West	0	13	13	Perimeter	West	2012-03-02	403	0	0
2	InterWest	1	1	1	Perimeter	InterWest	2012-03-02	31	45	0
2	InterWest	1	2	2	Adjacent	InterWest	2012-03-02	62	45	0
2	InterWest	1	3	3	Inside	InterWest	2012-03-02	93	45	0
2	InterWest	1	4	4	Inside	InterWest	2012-03-02	124	45	0
2	InterWest	1	5	5	Inside	InterWest	2012-03-02	155	45	0
2	InterWest	1	6	6	Inside	InterWest	2012-03-02	186	45	0
2	InterWest	1	7	7	Inside	InterWest	2012-03-02	217	45	0
2	InterWest	1	8	8	Inside	InterWest	2012-03-02	248	45	0
2	InterWest	1	9	9	Inside	InterWest	2012-03-02	279	45	0
2	InterWest	1	10	10	Inside	InterWest	2012-03-02	310	45	0
2	InterWest	1	11	11	Inside	InterWest	2012-03-02	341	45	0
2	InterWest	1	12	12	Adjacent	InterWest	2012-03-02	372	45	0
2	InterWest	1	13	13	Perimeter	InterWest	2012-03-02	403	45	0
3	Middle	2	1	1	Perimeter	Middle	2012-03-02	31	90	0
3	Middle	2	2	2	Adjacent	Middle	2012-03-02	62	90	0
3	Middle	2	3	3	Inside	Middle	2012-03-02	93	90	0
3	Middle	2	4	4	Inside	Middle	2012-03-02	124	90	0
3	Middle	2	5	5	Inside	Middle	2012-03-02	155	90	0
3	Middle	2	6	6	Inside	Middle	2012-03-02	186	90	0
3	Middle	2	7	7	Inside	Middle	2012-03-02	217	90	0
3	Middle	2	8	8	Inside	Middle	2012-03-02	248	90	0
3	Middle	2	9	9	Inside	Middle	2012-03-02	279	90	0
3	Middle	2	10	10	Inside	Middle	2012-03-02	310	90	0
3	Middle	2	11	11	Inside	Middle	2012-03-02	341	90	0
3	Middle	2	12	12	Adjacent	Middle	2012-03-02	372	90	0
3	Middle	2	13	13	Perimeter	Middle	2012-03-02	403	90	0
4	InterEast	3	1	1	Perimeter	InterEast	2012-03-02	31	135	0
4	InterEast	3	2	2	Adjacent	InterEast	2012-03-02	62	135	0
4	InterEast	3	3	3	Inside	InterEast	2012-03-02	93	135	0
4	InterEast	3	4	4	Inside	InterEast	2012-03-02	124	135	0
4	InterEast	3	5	5	Inside	InterEast	2012-03-02	155	135	0
4	InterEast	3	6	6	Inside	InterEast	2012-03-02	186	135	0
4	InterEast	3	7	7	Inside	InterEast	2012-03-02	217	135	0
4	InterEast	3	8	8	Inside	InterEast	2012-03-02	248	135	0
4	InterEast	3	9	9	Inside	InterEast	2012-03-02	279	135	0
4	InterEast	3	10	10	Inside	InterEast	2012-03-02	310	135	0
4	InterEast	3	11	11	Inside	InterEast	2012-03-02	341	135	0
4	InterEast	3	12	12	Adjacent	InterEast	2012-03-02	372	135	0
4	InterEast	3	13	13	Perimeter	InterEast	2012-03-02	403	135	0
5	East	4	1	1	Perimeter	East	2012-03-02	31	180	0
5	East	4	2	2	Perimeter	East	2012-03-02	62	180	0
5	East	4	3	3	Perimeter	East	2012-03-02	93	180	0
5	East	4	4	4	Perimeter	East	2012-03-02	124	180	0
5	East	4	5	5	Perimeter	East	2012-03-02	155	180	0
5	East	4	6	6	Perimeter	East	2012-03-02	186	180	0
5	East	4	7	7	Perimeter	East	2012-03-02	217	180	0
5	East	4	8	8	Perimeter	East	2012-03-02	248	180	0
5	East	4	9	9	Perimeter	East	2012-03-02	279	180	0
5	East	4	10	10	Perimeter	East	2012-03-02	310	180	0
5	East	4	11	11	Perimeter	East	2012-03-02	341	180	0
5	East	4	12	12	Perimeter	East	2012-03-02	372	180	0
5	East	4	13	13	Perimeter	East	2012-03-02	403	180	0
1	West	0	1	1	Perimeter	West	2012-04-09	31	0	0
1	West	0	2	2	Perimeter	West	2012-04-09	62	0	0
1	West	0	3	3	Perimeter	West	2012-04-09	93	0	0
1	West	0	4	4	Perimeter	West	2012-04-09	124	0	0
1	West	0	5	5	Perimeter	West	2012-04-09	155	0	0
1	West	0	6	6	Perimeter	West	2012-04-09	186	0	0
1	West	0	7	7	Perimeter	West	2012-04-09	217	0	0
1	West	0	8	8	Perimeter	West	2012-04-09	248	0	0
1	West	0	9	9	Perimeter	West	2012-04-09	279	0	0
1	West	0	10	10	Perimeter	West	2012-04-09	310	0	0
1	West	0	11	11	Perimeter	West	2012-04-09	341	0	0
1	West	0	12	12	Perimeter	West	2012-04-09	372	0	0
1	West	0	13	13	Perimeter	West	2012-04-09	403	0	0
2	InterWest	1	1	1	Perimeter	InterWest	2012-04-09	31	45	0
2	InterWest	1	2	2	Adjacent	InterWest	2012-04-09	62	45	0
2	InterWest	1	3	3	Inside	InterWest	2012-04-09	93	45	0
2	InterWest	1	4	4	Inside	InterWest	2012-04-09	124	45	0
2	InterWest	1	5	5	Inside	InterWest	2012-04-09	155	45	0
2	InterWest	1	6	6	Inside	InterWest	2012-04-09	186	45	0
2	InterWest	1	7	7	Inside	InterWest	2012-04-09	217	45	0
2	InterWest	1	8	8	Inside	InterWest	2012-04-09	248	45	0
2	InterWest	1	9	9	Inside	InterWest	2012-04-09	279	45	0
2	InterWest	1	10	10	Inside	InterWest	2012-04-09	310	45	0
2	InterWest	1	11	11	Inside	InterWest	2012-04-09	341	45	0
2	InterWest	1	12	12	Adjacent	InterWest	2012-04-09	372	45	0
2	InterWest	1	13	13	Perimeter	InterWest	2012-04-09	403	45	0
3	Middle	2	1	1	Perimeter	Middle	2012-04-09	31	90	0
3	Middle	2	2	2	Adjacent	Middle	2012-04-09	62	90	0
3	Middle	2	3	3	Inside	Middle	2012-04-09	93	90	0
3	Middle	2	4	4	Inside	Middle	2012-04-09	124	90	0
3	Middle	2	5	5	Inside	Middle	2012-04-09	155	90	0
3	Middle	2	6	6	Inside	Middle	2012-04-09	186	90	0
3	Middle	2	7	7	Inside	Middle	2012-04-09	217	90	0
3	Middle	2	8	8	Inside	Middle	2012-04-09	248	90	0
3	Middle	2	9	9	Inside	Middle	2012-04-09	279	90	0
3	Middle	2	10	10	Inside	Middle	2012-04-09	310	90	0
3	Middle	2	11	11	Inside	Middle	2012-04-09	341	90	0
3	Middle	2	12	12	Adjacent	Middle	2012-04-09	372	90	0
3	Middle	2	13	13	Perimeter	Middle	2012-04-09	403	90	0
4	InterEast	3	1	1	Perimeter	InterEast	2012-04-09	31	135	0
4	InterEast	3	2	2	Adjacent	InterEast	2012-04-09	62	135	0
4	InterEast	3	3	3	Inside	InterEast	2012-04-09	93	135	0
4	InterEast	3	4	4	Inside	InterEast	2012-04-09	124	135	0
4	InterEast	3	5	5	Inside	InterEast	2012-04-09	155	135	0
4	InterEast	3	6	6	Inside	InterEast	2012-04-09	186	135	0
4	InterEast	3	7	7	Inside	InterEast	2012-04-09	217	135	0
4	InterEast	3	8	8	Inside	InterEast	2012-04-09	248	135	0
4	InterEast	3	9	9	Inside	InterEast	2012-04-09	279	135	0
4	InterEast	3	10	10	Inside	InterEast	2012-04-09	310	135	0
4	InterEast	3	11	11	Inside	InterEast	2012-04-09	341	135	0
4	InterEast	3	12	12	Adjacent	InterEast	2012-04-09	372	135	0
4	InterEast	3	13	13	Perimeter	InterEast	2012-04-09	403	135	0
5	East	4	1	1	Perimeter	East	2012-04-09	31	180	0
5	East	4	2	2	Perimeter	East	2012-04-09	62	180	0
5	East	4	3	3	Perimeter	East	2012-04-09	93	180	0
5	East	4	4	4	Perimeter	East	2012-04-09	124	180	0
5	East	4	5	5	Perimeter	East	2012-04-09	155	180	0
5	East	4	6	6	Perimeter	East	2012-04-09	186	180	0
5	East	4	7	7	Perimeter	East	2012-04-09	217	180	0
5	East	4	8	8	Perimeter	East	2012-04-09	248	180	0
5	East	4	9	9	Perimeter	East	2012-04-09	279	180	0
5	East	4	10	10	Perimeter	East	2012-04-09	310	180	0
5	East	4	11	11	Perimeter	East	2012-04-09	341	180	0
5	East	4	12	12	Perimeter	East	2012-04-09	372	180	0
5	East	4	13	13	Perimeter	East	2012-04-09	403	180	0
1	West	0	1	1	Perimeter	West	2012-05-25	31	0	0
1	West	0	2	2	Perimeter	West	2012-05-25	62	0	0
1	West	0	3	3	Perimeter	West	2012-05-25	93	0	0
1	West	0	4	4	Perimeter	West	2012-05-25	124	0	0
1	West	0	5	5	Perimeter	West	2012-05-25	155	0	0
1	West	0	6	6	Perimeter	West	2012-05-25	186	0	0
1	West	0	7	7	Perimeter	West	2012-05-25	217	0	1
1	West	0	8	8	Perimeter	West	2012-05-25	248	0	0
1	West	0	9	9	Perimeter	West	2012-05-25	279	0	0
1	West	0	10	10	Perimeter	West	2012-05-25	310	0	0
1	West	0	11	11	Perimeter	West	2012-05-25	341	0	0
1	West	0	12	12	Perimeter	West	2012-05-25	372	0	0
1	West	0	13	13	Perimeter	West	2012-05-25	403	0	0
2	InterWest	1	1	1	Perimeter	InterWest	2012-05-25	31	45	0
2	InterWest	1	2	2	Adjacent	InterWest	2012-05-25	62	45	0
2	InterWest	1	3	3	Inside	InterWest	2012-05-25	93	45	0
2	InterWest	1	4	4	Inside	InterWest	2012-05-25	124	45	0
2	InterWest	1	5	5	Inside	InterWest	2012-05-25	155	45	0
2	InterWest	1	6	6	Inside	InterWest	2012-05-25	186	45	0
2	InterWest	1	7	7	Inside	InterWest	2012-05-25	217	45	0
2	InterWest	1	8	8	Inside	InterWest	2012-05-25	248	45	0
2	InterWest	1	9	9	Inside	InterWest	2012-05-25	279	45	0
2	InterWest	1	10	10	Inside	InterWest	2012-05-25	310	45	0
2	InterWest	1	11	11	Inside	InterWest	2012-05-25	341	45	1
2	InterWest	1	12	12	Adjacent	InterWest	2012-05-25	372	45	0
2	InterWest	1	13	13	Perimeter	InterWest	2012-05-25	403	45	0
3	Middle	2	1	1	Perimeter	Middle	2012-05-25	31	90	0
3	Middle	2	2	2	Adjacent	Middle	2012-05-25	62	90	0
3	Middle	2	3	3	Inside	Middle	2012-05-25	93	90	0
3	Middle	2	4	4	Inside	Middle	2012-05-25	124	90	0
3	Middle	2	5	5	Inside	Middle	2012-05-25	155	90	0
3	Middle	2	6	6	Inside	Middle	2012-05-25	186	90	0
3	Middle	2	7	7	Inside	Middle	2012-05-25	217	90	0
3	Middle	2	8	8	Inside	Middle	2012-05-25	248	90	0
3	Middle	2	9	9	Inside	Middle	2012-05-25	279	90	0
3	Middle	2	10	10	Inside	Middle	2012-05-25	310	90	0
3	Middle	2	11	11	Inside	Middle	2012-05-25	341	90	0
3	Middle	2	12	12	Adjacent	Middle	2012-05-25	372	90	1
3	Middle	2	13	13	Perimeter	Middle	2012-05-25	403	90	0
4	InterEast	3	1	1	Perimeter	InterEast	2012-05-25	31	135	0
4	InterEast	3	2	2	Adjacent	InterEast	2012-05-25	62	135	0
4	InterEast	3	3	3	Inside	InterEast	2012-05-25	93	135	0
4	InterEast	3	4	4	Inside	InterEast	2012-05-25	124	135	0
4	InterEast	3	5	5	Inside	InterEast	2012-05-25	155	135	0
4	InterEast	3	6	6	Inside	InterEast	2012-05-25	186	135	0
4	InterEast	3	7	7	Inside	InterEast	2012-05-25	217	135	0
4	InterEast	3	8	8	Inside	InterEast	2012-05-25	248	135	0
4	InterEast	3	9	9	Inside	InterEast	2012-05-25	279	135	0
4	InterEast	3	10	10	Inside	InterEast	2012-05-25	310	135	0
4	InterEast	3	11	11	Inside	InterEast	2012-05-25	341	135	0
4	InterEast	3	12	12	Adjacent	InterEast	2012-05-25	372	135	0
4	InterEast	3	13	13	Perimeter	InterEast	2012-05-25	403	135	0
5	East	4	1	1	Perimeter	East	2012-05-25	31	180	0
5	East	4	2	2	Perimeter	East	2012-05-25	62	180	1
5	East	4	3	3	Perimeter	East	2012-05-25	93	180	0
5	East	4	4	4	Perimeter	East	2012-05-25	124	180	0
5	East	4	5	5	Perimeter	East	2012-05-25	155	180	0
5	East	4	6	6	Perimeter	East	2012-05-25	186	180	0
5	East	4	7	7	Perimeter	East	2012-05-25	217	180	0
5	East	4	8	8	Perimeter	East	2012-05-25	248	180	0
5	East	4	9	9	Perimeter	East	2012-05-25	279	180	0
5	East	4	10	10	Perimeter	East	2012-05-25	310	180	3
5	East	4	11	11	Perimeter	East	2012-05-25	341	180	0
5	East	4	12	12	Perimeter	East	2012-05-25	372	180	5
5	East	4	13	13	Perimeter	East	2012-05-25	403	180	4
1	West	0	1	1	Perimeter	West	2012-06-13	31	0	0
1	West	0	2	2	Perimeter	West	2012-06-13	62	0	0
1	West	0	3	3	Perimeter	West	2012-06-13	93	0	0
1	West	0	4	4	Perimeter	West	2012-06-13	124	0	1
1	West	0	5	5	Perimeter	West	2012-06-13	155	0	0
1	West	0	6	6	Perimeter	West	2012-06-13	186	0	0
1	West	0	7	7	Perimeter	West	2012-06-13	217	0	0
1	West	0	8	8	Perimeter	West	2012-06-13	248	0	0
1	West	0	9	9	Perimeter	West	2012-06-13	279	0	0
1	West	0	10	10	Perimeter	West	2012-06-13	310	0	6
1	West	0	11	11	Perimeter	West	2012-06-13	341	0	0
1	West	0	12	12	Perimeter	West	2012-06-13	372	0	0
1	West	0	13	13	Perimeter	West	2012-06-13	403	0	7
2	InterWest	1	1	1	Perimeter	InterWest	2012-06-13	31	45	0
2	InterWest	1	2	2	Adjacent	InterWest	2012-06-13	62	45	0
2	InterWest	1	3	3	Inside	InterWest	2012-06-13	93	45	0
2	InterWest	1	4	4	Inside	InterWest	2012-06-13	124	45	2
2	InterWest	1	5	5	Inside	InterWest	2012-06-13	155	45	0
2	InterWest	1	6	6	Inside	InterWest	2012-06-13	186	45	0
2	InterWest	1	7	7	Inside	InterWest	2012-06-13	217	45	0
2	InterWest	1	8	8	Inside	InterWest	2012-06-13	248	45	3
2	InterWest	1	9	9	Inside	InterWest	2012-06-13	279	45	0
2	InterWest	1	10	10	Inside	InterWest	2012-06-13	310	45	0
2	InterWest	1	11	11	Inside	InterWest	2012-06-13	341	45	0
2	InterWest	1	12	12	Adjacent	InterWest	2012-06-13	372	45	0
2	InterWest	1	13	13	Perimeter	InterWest	2012-06-13	403	45	0
3	Middle	2	1	1	Perimeter	Middle	2012-06-13	31	90	0
3	Middle	2	2	2	Adjacent	Middle	2012-06-13	62	90	0
3	Middle	2	3	3	Inside	Middle	2012-06-13	93	90	0
3	Middle	2	4	4	Inside	Middle	2012-06-13	124	90	0
3	Middle	2	5	5	Inside	Middle	2012-06-13	155	90	0
3	Middle	2	6	6	Inside	Middle	2012-06-13	186	90	1
3	Middle	2	7	7	Inside	Middle	2012-06-13	217	90	0
3	Middle	2	8	8	Inside	Middle	2012-06-13	248	90	0
3	Middle	2	9	9	Inside	Middle	2012-06-13	279	90	0
3	Middle	2	10	10	Inside	Middle	2012-06-13	310	90	0
3	Middle	2	11	11	Inside	Middle	2012-06-13	341	90	0
3	Middle	2	12	12	Adjacent	Middle	2012-06-13	372	90	2
3	Middle	2	13	13	Perimeter	Middle	2012-06-13	403	90	0
4	InterEast	3	1	1	Perimeter	InterEast	2012-06-13	31	135	0
4	InterEast	3	2	2	Adjacent	InterEast	2012-06-13	62	135	0
4	InterEast	3	3	3	Inside	InterEast	2012-06-13	93	135	2
4	InterEast	3	4	4	Inside	InterEast	2012-06-13	124	135	0
4	InterEast	3	5	5	Inside	InterEast	2012-06-13	155	135	0
4	InterEast	3	6	6	Inside	InterEast	2012-06-13	186	135	0
4	InterEast	3	7	7	Inside	InterEast	2012-06-13	217	135	0
4	InterEast	3	8	8	Inside	InterEast	2012-06-13	248	135	0
4	InterEast	3	9	9	Inside	InterEast	2012-06-13	279	135	1
4	InterEast	3	10	10	Inside	InterEast	2012-06-13	310	135	0
4	InterEast	3	11	11	Inside	InterEast	2012-06-13	341	135	1
4	InterEast	3	12	12	Adjacent	InterEast	2012-06-13	372	135	2
4	InterEast	3	13	13	Perimeter	InterEast	2012-06-13	403	135	0
5	East	4	1	1	Perimeter	East	2012-06-13	31	180	1
5	East	4	2	2	Perimeter	East	2012-06-13	62	180	1
5	East	4	3	3	Perimeter	East	2012-06-13	93	180	1
5	East	4	4	4	Perimeter	East	2012-06-13	124	180	0
5	East	4	5	5	Perimeter	East	2012-06-13	155	180	0
5	East	4	6	6	Perimeter	East	2012-06-13	186	180	0
5	East	4	7	7	Perimeter	East	2012-06-13	217	180	0
5	East	4	8	8	Perimeter	East	2012-06-13	248	180	0
5	East	4	9	9	Perimeter	East	2012-06-13	279	180	0
5	East	4	10	10	Perimeter	East	2012-06-13	310	180	32
5	East	4	11	11	Perimeter	East	2012-06-13	341	180	0
5	East	4	12	12	Perimeter	East	2012-06-13	372	180	2
5	East	4	13	13	Perimeter	East	2012-06-13	403	180	3
1	West	0	1	1	Perimeter	West	2012-07-18	31	0	0
1	West	0	2	2	Perimeter	West	2012-07-18	62	0	0
1	West	0	3	3	Perimeter	West	2012-07-18	93	0	3
1	West	0	4	4	Perimeter	West	2012-07-18	124	0	0
1	West	0	5	5	Perimeter	West	2012-07-18	155	0	3
1	West	0	6	6	Perimeter	West	2012-07-18	186	0	0
1	West	0	7	7	Perimeter	West	2012-07-18	217	0	0
1	West	0	8	8	Perimeter	West	2012-07-18	248	0	0
1	West	0	9	9	Perimeter	West	2012-07-18	279	0	0
1	West	0	10	10	Perimeter	West	2012-07-18	310	0	79
1	West	0	11	11	Perimeter	West	2012-07-18	341	0	15
1	West	0	12	12	Perimeter	West	2012-07-18	372	0	69
1	West	0	13	13	Perimeter	West	2012-07-18	403	0	48
2	InterWest	1	1	1	Perimeter	InterWest	2012-07-18	31	45	1
2	InterWest	1	2	2	Adjacent	InterWest	2012-07-18	62	45	2
2	InterWest	1	3	3	Inside	InterWest	2012-07-18	93	45	1
2	InterWest	1	4	4	Inside	InterWest	2012-07-18	124	45	2
2	InterWest	1	5	5	Inside	InterWest	2012-07-18	155	45	0
2	InterWest	1	6	6	Inside	InterWest	2012-07-18	186	45	0
2	InterWest	1	7	7	Inside	InterWest	2012-07-18	217	45	1
2	InterWest	1	8	8	Inside	InterWest	2012-07-18	248	45	0
2	InterWest	1	9	9	Inside	InterWest	2012-07-18	279	45	1
2	InterWest	1	10	10	Inside	InterWest	2012-07-18	310	45	2
2	InterWest	1	11	11	Inside	InterWest	2012-07-18	341	45	0
2	InterWest	1	12	12	Adjacent	InterWest	2012-07-18	372	45	0
2	InterWest	1	13	13	Perimeter	InterWest	2012-07-18	403	45	0
3	Middle	2	1	1	Perimeter	Middle	2012-07-18	31	90	1
3	Middle	2	2	2	Adjacent	Middle	2012-07-18	62	90	0
3	Middle	2	3	3	Inside	Middle	2012-07-18	93	90	0
3	Middle	2	4	4	Inside	Middle	2012-07-18	124	90	0
3	Middle	2	5	5	Inside	Middle	2012-07-18	155	90	0
3	Middle	2	6	6	Inside	Middle	2012-07-18	186	90	0
3	Middle	2	7	7	Inside	Middle	2012-07-18	217	90	0
3	Middle	2	8	8	Inside	Middle	2012-07-18	248	90	0
3	Middle	2	9	9	Inside	Middle	2012-07-18	279	90	0
3	Middle	2	10	10	Inside	Middle	2012-07-18	310	90	0
3	Middle	2	11	11	Inside	Middle	2012-07-18	341	90	0
3	Middle	2	12	12	Adjacent	Middle	2012-07-18	372	90	4
3	Middle	2	13	13	Perimeter	Middle	2012-07-18	403	90	0
4	InterEast	3	1	1	Perimeter	InterEast	2012-07-18	31	135	0
4	InterEast	3	2	2	Adjacent	InterEast	2012-07-18	62	135	0
4	InterEast	3	3	3	Inside	InterEast	2012-07-18	93	135	0
4	InterEast	3	4	4	Inside	InterEast	2012-07-18	124	135	0
4	InterEast	3	5	5	Inside	InterEast	2012-07-18	155	135	0
4	InterEast	3	6	6	Inside	InterEast	2012-07-18	186	135	0
4	InterEast	3	7	7	Inside	InterEast	2012-07-18	217	135	0
4	InterEast	3	8	8	Inside	InterEast	2012-07-18	248	135	0
4	InterEast	3	9	9	Inside	InterEast	2012-07-18	279	135	0
4	InterEast	3	10	10	Inside	InterEast	2012-07-18	310	135	0
4	InterEast	3	11	11	Inside	InterEast	2012-07-18	341	135	0
4	InterEast	3	12	12	Adjacent	InterEast	2012-07-18	372	135	3
4	InterEast	3	13	13	Perimeter	InterEast	2012-07-18	403	135	0
5	East	4	1	1	Perimeter	East	2012-07-18	31	180	17
5	East	4	2	2	Perimeter	East	2012-07-18	62	180	2
5	East	4	3	3	Perimeter	East	2012-07-18	93	180	1
5	East	4	4	4	Perimeter	East	2012-07-18	124	180	0
5	East	4	5	5	Perimeter	East	2012-07-18	155	180	0
5	East	4	6	6	Perimeter	East	2012-07-18	186	180	0
5	East	4	7	7	Perimeter	East	2012-07-18	217	180	1
5	East	4	8	8	Perimeter	East	2012-07-18	248	180	0
5	East	4	9	9	Perimeter	East	2012-07-18	279	180	0
5	East	4	10	10	Perimeter	East	2012-07-18	310	180	110
5	East	4	11	11	Perimeter	East	2012-07-18	341	180	2
5	East	4	12	12	Perimeter	East	2012-07-18	372	180	0
5	East	4	13	13	Perimeter	East	2012-07-18	403	180	1
1	West	0	1	1	Perimeter	West	2012-08-24	31	0	1
1	West	0	2	2	Perimeter	West	2012-08-24	62	0	16
1	West	0	3	3	Perimeter	West	2012-08-24	93	0	19
1	West	0	4	4	Perimeter	West	2012-08-24	124	0	4
1	West	0	5	5	Perimeter	West	2012-08-24	155	0	8
1	West	0	6	6	Perimeter	West	2012-08-24	186	0	1
1	West	0	7	7	Perimeter	West	2012-08-24	217	0	4
1	West	0	8	8	Perimeter	West	2012-08-24	248	0	42
1	West	0	9	9	Perimeter	West	2012-08-24	279	0	12
1	West	0	10	10	Perimeter	West	2012-08-24	310	0	71
1	West	0	11	11	Perimeter	West	2012-08-24	341	0	84
1	West	0	12	12	Perimeter	West	2012-08-24	372	0	34
1	West	0	13	13	Perimeter	West	2012-08-24	403	0	51
2	InterWest	1	1	1	Perimeter	InterWest	2012-08-24	31	45	13
2	InterWest	1	2	2	Adjacent	InterWest	2012-08-24	62	45	0
2	InterWest	1	3	3	Inside	InterWest	2012-08-24	93	45	1
2	InterWest	1	4	4	Inside	InterWest	2012-08-24	124	45	11
2	InterWest	1	5	5	Inside	InterWest	2012-08-24	155	45	8
2	InterWest	1	6	6	Inside	InterWest	2012-08-24	186	45	2
2	InterWest	1	7	7	Inside	InterWest	2012-08-24	217	45	2
2	InterWest	1	8	8	Inside	InterWest	2012-08-24	248	45	5
2	InterWest	1	9	9	Inside	InterWest	2012-08-24	279	45	10
2	InterWest	1	10	10	Inside	InterWest	2012-08-24	310	45	0
2	InterWest	1	11	11	Inside	InterWest	2012-08-24	341	45	0
2	InterWest	1	12	12	Adjacent	InterWest	2012-08-24	372	45	12
2	InterWest	1	13	13	Perimeter	InterWest	2012-08-24	403	45	4
3	Middle	2	1	1	Perimeter	Middle	2012-08-24	31	90	11
3	Middle	2	2	2	Adjacent	Middle	2012-08-24	62	90	12
3	Middle	2	3	3	Inside	Middle	2012-08-24	93	90	4
3	Middle	2	4	4	Inside	Middle	2012-08-24	124	90	8
3	Middle	2	5	5	Inside	Middle	2012-08-24	155	90	10
3	Middle	2	6	6	Inside	Middle	2012-08-24	186	90	29
3	Middle	2	7	7	Inside	Middle	2012-08-24	217	90	7
3	Middle	2	8	8	Inside	Middle	2012-08-24	248	90	5
3	Middle	2	9	9	Inside	Middle	2012-08-24	279	90	5
3	Middle	2	10	10	Inside	Middle	2012-08-24	310	90	2
3	Middle	2	11	11	Inside	Middle	2012-08-24	341	90	5
3	Middle	2	12	12	Adjacent	Middle	2012-08-24	372	90	5
3	Middle	2	13	13	Perimeter	Middle	2012-08-24	403	90	24
4	InterEast	3	1	1	Perimeter	InterEast	2012-08-24	31	135	24
4	InterEast	3	2	2	Adjacent	InterEast	2012-08-24	62	135	8
4	InterEast	3	3	3	Inside	InterEast	2012-08-24	93	135	7
4	InterEast	3	4	4	Inside	InterEast	2012-08-24	124	135	20
4	InterEast	3	5	5	Inside	InterEast	2012-08-24	155	135	13
4	InterEast	3	6	6	Inside	InterEast	2012-08-24	186	135	26
4	InterEast	3	7	7	Inside	InterEast	2012-08-24	217	135	7
4	InterEast	3	8	8	Inside	InterEast	2012-08-24	248	135	5
4	InterEast	3	9	9	Inside	InterEast	2012-08-24	279	135	21
4	InterEast	3	10	10	Inside	InterEast	2012-08-24	310	135	6
4	InterEast	3	11	11	Inside	InterEast	2012-08-24	341	135	11
4	InterEast	3	12	12	Adjacent	InterEast	2012-08-24	372	135	62
4	InterEast	3	13	13	Perimeter	InterEast	2012-08-24	403	135	23
5	East	4	1	1	Perimeter	East	2012-08-24	31	180	3
5	East	4	2	2	Perimeter	East	2012-08-24	62	180	9
5	East	4	3	3	Perimeter	East	2012-08-24	93	180	26
5	East	4	4	4	Perimeter	East	2012-08-24	124	180	27
5	East	4	5	5	Perimeter	East	2012-08-24	155	180	16
5	East	4	6	6	Perimeter	East	2012-08-24	186	180	36
5	East	4	7	7	Perimeter	East	2012-08-24	217	180	46
5	East	4	8	8	Perimeter	East	2012-08-24	248	180	43
5	East	4	9	9	Perimeter	East	2012-08-24	279	180	17
5	East	4	10	10	Perimeter	East	2012-08-24	310	180	69
5	East	4	11	11	Perimeter	East	2012-08-24	341	180	25
5	East	4	12	12	Perimeter	East	2012-08-24	372	180	72
5	East	4	13	13	Perimeter	East	2012-08-24	403	180	82
1	West	0	1	1	Perimeter	West	2012-09-21	31	0	9
1	West	0	2	2	Perimeter	West	2012-09-21	62	0	13
1	West	0	3	3	Perimeter	West	2012-09-21	93	0	14
1	West	0	4	4	Perimeter	West	2012-09-21	124	0	2
1	West	0	5	5	Perimeter	West	2012-09-21	155	0	3
1	West	0	6	6	Perimeter	West	2012-09-21	186	0	0
1	West	0	7	7	Perimeter	West	2012-09-21	217	0	3
1	West	0	8	8	Perimeter	West	2012-09-21	248	0	73
1	West	0	9	9	Perimeter	West	2012-09-21	279	0	158
1	West	0	10	10	Perimeter	West	2012-09-21	310	0	124
1	West	0	11	11	Perimeter	West	2012-09-21	341	0	164
1	West	0	12	12	Perimeter	West	2012-09-21	372	0	46
1	West	0	13	13	Perimeter	West	2012-09-21	403	0	27
2	InterWest	1	1	1	Perimeter	InterWest	2012-09-21	31	45	8
2	InterWest	1	2	2	Adjacent	InterWest	2012-09-21	62	45	0
2	InterWest	1	3	3	Inside	InterWest	2012-09-21	93	45	0
2	InterWest	1	4	4	Inside	InterWest	2012-09-21	124	45	8
2	InterWest	1	5	5	Inside	InterWest	2012-09-21	155	45	3
2	InterWest	1	6	6	Inside	InterWest	2012-09-21	186	45	0
2	InterWest	1	7	7	Inside	InterWest	2012-09-21	217	45	4
2	InterWest	1	8	8	Inside	InterWest	2012-09-21	248	45	7
2	InterWest	1	9	9	Inside	InterWest	2012-09-21	279	45	3
2	InterWest	1	10	10	Inside	InterWest	2012-09-21	310	45	0
2	InterWest	1	11	11	Inside	InterWest	2012-09-21	341	45	0
2	InterWest	1	12	12	Adjacent	InterWest	2012-09-21	372	45	2
2	InterWest	1	13	13	Perimeter	InterWest	2012-09-21	403	45	9
3	Middle	2	1	1	Perimeter	Middle	2012-09-21	31	90	16
3	Middle	2	2	2	Adjacent	Middle	2012-09-21	62	90	8
3	Middle	2	3	3	Inside	Middle	2012-09-21	93	90	3
3	Middle	2	4	4	Inside	Middle	2012-09-21	124	90	1
3	Middle	2	5	5	Inside	Middle	2012-09-21	155	90	6
3	Middle	2	6	6	Inside	Middle	2012-09-21	186	90	18
3	Middle	2	7	7	Inside	Middle	2012-09-21	217	90	6
3	Middle	2	8	8	Inside	Middle	2012-09-21	248	90	4
3	Middle	2	9	9	Inside	Middle	2012-09-21	279	90	2
3	Middle	2	10	10	Inside	Middle	2012-09-21	310	90	3
3	Middle	2	11	11	Inside	Middle	2012-09-21	341	90	3
3	Middle	2	12	12	Adjacent	Middle	2012-09-21	372	90	5
3	Middle	2	13	13	Perimeter	Middle	2012-09-21	403	90	21
4	InterEast	3	1	1	Perimeter	InterEast	2012-09-21	31	135	15
4	InterEast	3	2	2	Adjacent	InterEast	2012-09-21	62	135	7
4	InterEast	3	3	3	Inside	InterEast	2012-09-21	93	135	9
4	InterEast	3	4	4	Inside	InterEast	2012-09-21	124	135	6
4	InterEast	3	5	5	Inside	InterEast	2012-09-21	155	135	22
4	InterEast	3	6	6	Inside	InterEast	2012-09-21	186	135	9
4	InterEast	3	7	7	Inside	InterEast	2012-09-21	217	135	5
4	InterEast	3	8	8	Inside	InterEast	2012-09-21	248	135	12
4	InterEast	3	9	9	Inside	InterEast	2012-09-21	279	135	18
4	InterEast	3	10	10	Inside	InterEast	2012-09-21	310	135	8
4	InterEast	3	11	11	Inside	InterEast	2012-09-21	341	135	10
4	InterEast	3	12	12	Adjacent	InterEast	2012-09-21	372	135	54
4	InterEast	3	13	13	Perimeter	InterEast	2012-09-21	403	135	32
5	East	4	1	1	Perimeter	East	2012-09-21	31	180	11
5	East	4	2	2	Perimeter	East	2012-09-21	62	180	24
5	East	4	3	3	Perimeter	East	2012-09-21	93	180	27
5	East	4	4	4	Perimeter	East	2012-09-21	124	180	32
5	East	4	5	5	Perimeter	East	2012-09-21	155	180	10
5	East	4	6	6	Perimeter	East	2012-09-21	186	180	47
5	East	4	7	7	Perimeter	East	2012-09-21	217	180	22
5	East	4	8	8	Perimeter	East	2012-09-21	248	180	28
5	East	4	9	9	Perimeter	East	2012-09-21	279	180	8
5	East	4	10	10	Perimeter	East	2012-09-21	310	180	110
5	East	4	11	11	Perimeter	East	2012-09-21	341	180	24
5	East	4	12	12	Perimeter	East	2012-09-21	372	180	71
5	East	4	13	13	Perimeter	East	2012-09-21	403	180	89
1	West	0	1	1	Perimeter	West	2012-10-08	31	0	6
1	West	0	2	2	Perimeter	West	2012-10-08	62	0	0
1	West	0	3	3	Perimeter	West	2012-10-08	93	0	3
1	West	0	4	4	Perimeter	West	2012-10-08	124	0	0
1	West	0	5	5	Perimeter	West	2012-10-08	155	0	0
1	West	0	6	6	Perimeter	West	2012-10-08	186	0	0
1	West	0	7	7	Perimeter	West	2012-10-08	217	0	6
1	West	0	8	8	Perimeter	West	2012-10-08	248	0	5
1	West	0	9	9	Perimeter	West	2012-10-08	279	0	2
1	West	0	10	10	Perimeter	West	2012-10-08	310	0	19
1	West	0	11	11	Perimeter	West	2012-10-08	341	0	67
1	West	0	12	12	Perimeter	West	2012-10-08	372	0	7
1	West	0	13	13	Perimeter	West	2012-10-08	403	0	21
2	InterWest	1	1	1	Perimeter	InterWest	2012-10-08	31	45	0
2	InterWest	1	2	2	Adjacent	InterWest	2012-10-08	62	45	0
2	InterWest	1	3	3	Inside	InterWest	2012-10-08	93	45	0
2	InterWest	1	4	4	Inside	InterWest	2012-10-08	124	45	1
2	InterWest	1	5	5	Inside	InterWest	2012-10-08	155	45	0
2	InterWest	1	6	6	Inside	InterWest	2012-10-08	186	45	0
2	InterWest	1	7	7	Inside	InterWest	2012-10-08	217	45	0
2	InterWest	1	8	8	Inside	InterWest	2012-10-08	248	45	1
2	InterWest	1	9	9	Inside	InterWest	2012-10-08	279	45	3
2	InterWest	1	10	10	Inside	InterWest	2012-10-08	310	45	0
2	InterWest	1	11	11	Inside	InterWest	2012-10-08	341	45	1
2	InterWest	1	12	12	Adjacent	InterWest	2012-10-08	372	45	0
2	InterWest	1	13	13	Perimeter	InterWest	2012-10-08	403	45	9
3	Middle	2	1	1	Perimeter	Middle	2012-10-08	31	90	4
3	Middle	2	2	2	Adjacent	Middle	2012-10-08	62	90	8
3	Middle	2	3	3	Inside	Middle	2012-10-08	93	90	5
3	Middle	2	4	4	Inside	Middle	2012-10-08	124	90	2
3	Middle	2	5	5	Inside	Middle	2012-10-08	155	90	0
3	Middle	2	6	6	Inside	Middle	2012-10-08	186	90	3
3	Middle	2	7	7	Inside	Middle	2012-10-08	217	90	0
3	Middle	2	8	8	Inside	Middle	2012-10-08	248	90	2
3	Middle	2	9	9	Inside	Middle	2012-10-08	279	90	1
3	Middle	2	10	10	Inside	Middle	2012-10-08	310	90	0
3	Middle	2	11	11	Inside	Middle	2012-10-08	341	90	0
3	Middle	2	12	12	Adjacent	Middle	2012-10-08	372	90	0
3	Middle	2	13	13	Perimeter	Middle	2012-10-08	403	90	2
4	InterEast	3	1	1	Perimeter	InterEast	2012-10-08	31	135	1
4	InterEast	3	2	2	Adjacent	InterEast	2012-10-08	62	135	2
4	InterEast	3	3	3	Inside	InterEast	2012-10-08	93	135	5
4	InterEast	3	4	4	Inside	InterEast	2012-10-08	124	135	1
4	InterEast	3	5	5	Inside	InterEast	2012-10-08	155	135	14
4	InterEast	3	6	6	Inside	InterEast	2012-10-08	186	135	2
4	InterEast	3	7	7	Inside	InterEast	2012-10-08	217	135	5
4	InterEast	3	8	8	Inside	InterEast	2012-10-08	248	135	2
4	InterEast	3	9	9	Inside	InterEast	2012-10-08	279	135	0
4	InterEast	3	10	10	Inside	InterEast	2012-10-08	310	135	6
4	InterEast	3	11	11	Inside	InterEast	2012-10-08	341	135	0
4	InterEast	3	12	12	Adjacent	InterEast	2012-10-08	372	135	1
4	InterEast	3	13	13	Perimeter	InterEast	2012-10-08	403	135	5
5	East	4	1	1	Perimeter	East	2012-10-08	31	180	1
5	East	4	2	2	Perimeter	East	2012-10-08	62	180	6
5	East	4	3	3	Perimeter	East	2012-10-08	93	180	15
5	East	4	4	4	Perimeter	East	2012-10-08	124	180	5
5	East	4	5	5	Perimeter	East	2012-10-08	155	180	5
5	East	4	6	6	Perimeter	East	2012-10-08	186	180	1
5	East	4	7	7	Perimeter	East	2012-10-08	217	180	7
5	East	4	8	8	Perimeter	East	2012-10-08	248	180	7
5	East	4	9	9	Perimeter	East	2012-10-08	279	180	19
5	East	4	10	10	Perimeter	East	2012-10-08	310	180	7
5	East	4	11	11	Perimeter	East	2012-10-08	341	180	14
5	East	4	12	12	Perimeter	East	2012-10-08	372	180	20
5	East	4	13	13	Perimeter	East	2012-10-08	403	180	2
1	West	0	1	1	Perimeter	West	Nov	31	0	2
1	West	0	2	2	Perimeter	West	Nov	62	0	1
1	West	0	3	3	Perimeter	West	Nov	93	0	1
1	West	0	4	4	Perimeter	West	Nov	124	0	4
1	West	0	5	5	Perimeter	West	Nov	155	0	0
1	West	0	6	6	Perimeter	West	Nov	186	0	0
1	West	0	7	7	Perimeter	West	Nov	217	0	0
1	West	0	8	8	Perimeter	West	Nov	248	0	0
1	West	0	9	9	Perimeter	West	Nov	279	0	0
1	West	0	10	10	Perimeter	West	Nov	310	0	2
1	West	0	11	11	Perimeter	West	Nov	341	0	5
1	West	0	12	12	Perimeter	West	Nov	372	0	4
1	West	0	13	13	Perimeter	West	Nov	403	0	10
2	InterWest	1	1	1	Perimeter	InterWest	Nov	31	45	0
2	InterWest	1	2	2	Adjacent	InterWest	Nov	62	45	1
2	InterWest	1	3	3	Inside	InterWest	Nov	93	45	0
2	InterWest	1	4	4	Inside	InterWest	Nov	124	45	0
2	InterWest	1	5	5	Inside	InterWest	Nov	155	45	0
2	InterWest	1	6	6	Inside	InterWest	Nov	186	45	0
2	InterWest	1	7	7	Inside	InterWest	Nov	217	45	0
2	InterWest	1	8	8	Inside	InterWest	Nov	248	45	0
2	InterWest	1	9	9	Inside	InterWest	Nov	279	45	2
2	InterWest	1	10	10	Inside	InterWest	Nov	310	45	0
2	InterWest	1	11	11	Inside	InterWest	Nov	341	45	2
2	InterWest	1	12	12	Adjacent	InterWest	Nov	372	45	0
2	InterWest	1	13	13	Perimeter	InterWest	Nov	403	45	4
3	Middle	2	1	1	Perimeter	Middle	Nov	31	90	0
3	Middle	2	2	2	Adjacent	Middle	Nov	62	90	0
3	Middle	2	3	3	Inside	Middle	Nov	93	90	0
3	Middle	2	4	4	Inside	Middle	Nov	124	90	0
3	Middle	2	5	5	Inside	Middle	Nov	155	90	0
3	Middle	2	6	6	Inside	Middle	Nov	186	90	0
3	Middle	2	7	7	Inside	Middle	Nov	217	90	0
3	Middle	2	8	8	Inside	Middle	Nov	248	90	0
3	Middle	2	9	9	Inside	Middle	Nov	279	90	0
3	Middle	2	10	10	Inside	Middle	Nov	310	90	0
3	Middle	2	11	11	Inside	Middle	Nov	341	90	0
3	Middle	2	12	12	Adjacent	Middle	Nov	372	90	0
3	Middle	2	13	13	Perimeter	Middle	Nov	403	90	1
4	InterEast	3	1	1	Perimeter	InterEast	Nov	31	135	0
4	InterEast	3	2	2	Adjacent	InterEast	Nov	62	135	2
4	InterEast	3	3	3	Inside	InterEast	Nov	93	135	1
4	InterEast	3	4	4	Inside	InterEast	Nov	124	135	0
4	InterEast	3	5	5	Inside	InterEast	Nov	155	135	0
4	InterEast	3	6	6	Inside	InterEast	Nov	186	135	0
4	InterEast	3	7	7	Inside	InterEast	Nov	217	135	0
4	InterEast	3	8	8	Inside	InterEast	Nov	248	135	0
4	InterEast	3	9	9	Inside	InterEast	Nov	279	135	0
4	InterEast	3	10	10	Inside	InterEast	Nov	310	135	0
4	InterEast	3	11	11	Inside	InterEast	Nov	341	135	0
4	InterEast	3	12	12	Adjacent	InterEast	Nov	372	135	0
4	InterEast	3	13	13	Perimeter	InterEast	Nov	403	135	0
5	East	4	1	1	Perimeter	East	Nov	31	180	2
5	East	4	2	2	Perimeter	East	Nov	62	180	8
5	East	4	3	3	Perimeter	East	Nov	93	180	3
5	East	4	4	4	Perimeter	East	Nov	124	180	2
5	East	4	5	5	Perimeter	East	Nov	155	180	3
5	East	4	6	6	Perimeter	East	Nov	186	180	3
5	East	4	7	7	Perimeter	East	Nov	217	180	5
5	East	4	8	8	Perimeter	East	Nov	248	180	6
5	East	4	9	9	Perimeter	East	Nov	279	180	4
5	East	4	10	10	Perimeter	East	Nov	310	180	2
5	East	4	11	11	Perimeter	East	Nov	341	180	2
5	East	4	12	12	Perimeter	East	Nov	372	180	8
5	East	4	13	13	Perimeter	East	Nov	403	180	9
